# Supplementary material for: The Potential Trajectory of Carbapenem-Resistant Enterobacteriaceae, an Emerging Threat to Health-Care Facilities, and the Impact of the Centers for Disease Control and Prevention Toolkit
Source: PubMed Central journal article supplement (PMC4772438; doi:10.1093/aje/kwv299), 2016-02-08
Supplement: supp_kwv299_kwv299supp.pdf [file supp_kwv299_kwv299supp.pdf]

**Web Figure 1.** Prevalence of carbapenem-resistant *Enterobacteriaceae* (CRE), by facility type, for uncoordinated control measures implemented at trigger thresholds of 20 (short-dashed black line), 50 (solid black line), and 100 (long-dashed black line) as compared with no specific control measures (gray line) in A) acute-care hospitals, B) long-term acute-care hospitals (LTACs), and C) nursing homes.

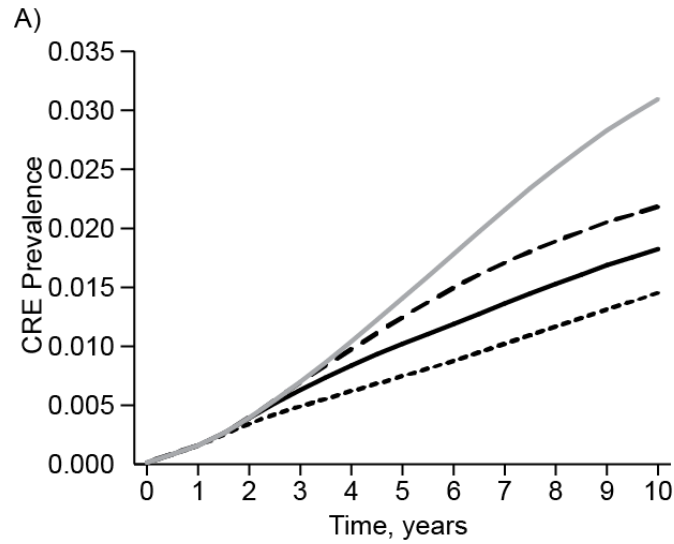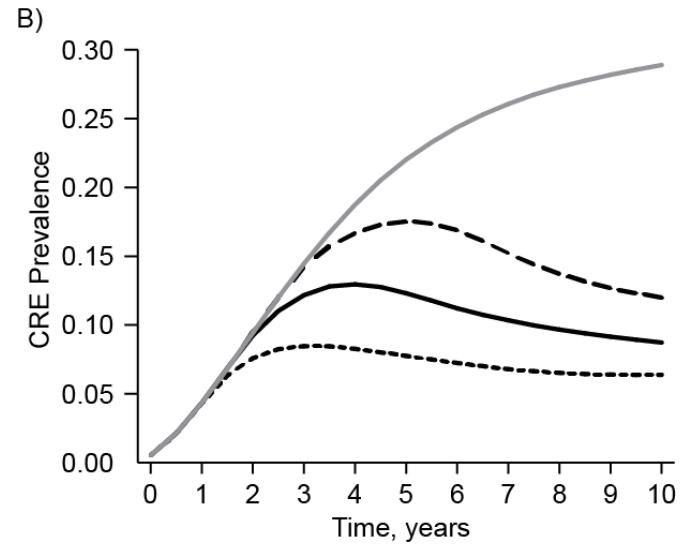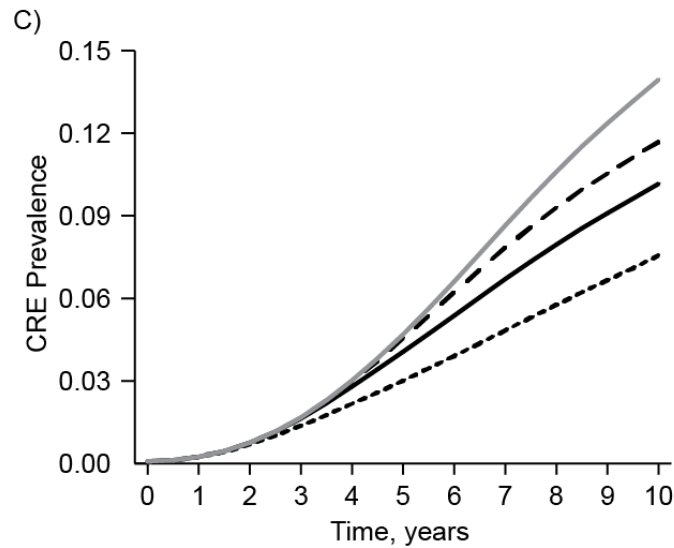

**Web Table 1.** Reduction in the prevalence of carbapenem-resistant *Enterobacteriaceae* (CRE) (95% CI in difference), by facility type, in comparison with baseline over a 10-year period for uncoordinated and coordinated regional approaches

| Approach                                      | Trigger | Year(s)            |                   |                   |                   |                   |                      |                      |                      |                      |                      |
|-----------------------------------------------|---------|--------------------|-------------------|-------------------|-------------------|-------------------|----------------------|----------------------|----------------------|----------------------|----------------------|
|                                               |         | 1                  | 2                 | 3                 | 4                 | 5                 | 6                    | 7                    | 8                    | 9                    | 10                   |
| <b>Acute-Care Hospitals</b>                   |         |                    |                   |                   |                   |                   |                      |                      |                      |                      |                      |
| Uncoordinated                                 | 1       | 0.02 (0.01, 0.02)  | 0.08 (0.08, 0.08) | 0.17 (0.17, 0.17) | 0.28 (0.28, 0.29) | 0.41 (0.41, 0.41) | 0.55 (0.54, 0.56)    | 0.68 (0.68, 0.69)    | 0.82 (0.82, 0.82)    | 0.95 (0.95, 0.96)    | 1.08 (1.08, 1.09)    |
|                                               | 10      | 0.00 (0.00, 0.00)  | 0.03 (0.02, 0.03) | 0.09 (0.09, 0.09) | 0.17 (0.17, 0.17) | 0.28 (0.27, 0.28) | 0.39 (0.39, 0.39)    | 0.51 (0.50, 0.51)    | 0.62 (0.62, 0.63)    | 0.74 (0.74, 0.74)    | 0.85 (0.84, 0.85)    |
|                                               | 20      | 0.00 (0.00, 0.00)  | 0.01 (0.01, 0.01) | 0.05 (0.05, 0.05) | 0.12 (0.12, 0.12) | 0.20 (0.20, 0.21) | 0.30 (0.30, 0.30)    | 0.41 (0.40, 0.41)    | 0.51 (0.51, 0.51)    | 0.62 (0.61, 0.62)    | 0.71 (0.71, 0.71)    |
| Coordinated regional                          | 1       | 0.02 (0.02, 0.02)  | 0.09 (0.09, 0.09) | 0.19 (0.19, 0.20) | 0.31 (0.31, 0.31) | 0.44 (0.44, 0.45) | 0.58 (0.58, 0.58)    | 0.72 (0.72, 0.73)    | 0.87 (0.86, 0.87)    | 1.00 (1.00, 1.00)    | 1.13 (1.13, 1.13)    |
|                                               | 10      | 0.00 (0.00, 0.00)  | 0.02 (0.02, 0.02) | 0.10 (0.10, 0.10) | 0.21 (0.21, 0.21) | 0.34 (0.34, 0.34) | 0.47 (0.47, 0.47)    | 0.61 (0.60, 0.61)    | 0.74 (0.74, 0.74)    | 0.87 (0.87, 0.87)    | 0.99 (0.99, 0.99)    |
|                                               | 20      | 0.00 (0.00, 0.00)  | 0.00 (0.00, 0.00) | 0.03 (0.03, 0.03) | 0.12 (0.12, 0.12) | 0.23 (0.23, 0.24) | 0.36 (0.36, 0.36)    | 0.49 (0.49, 0.49)    | 0.61 (0.61, 0.61)    | 0.73 (0.73, 0.73)    | 0.84 (0.84, 0.85)    |
| <b>Long-Term Acute-Care Hospitals (LTACs)</b> |         |                    |                   |                   |                   |                   |                      |                      |                      |                      |                      |
| Uncoordinated                                 | 1       | 0.67 (0.65, 0.68)  | 2.46 (2.44, 2.48) | 4.69 (4.66, 4.71) | 6.95 (6.93, 6.98) | 9.05 (9.03, 9.08) | 10.89 (10.87, 10.92) | 12.47 (12.44, 12.49) | 13.80 (13.78, 13.82) | 14.93 (14.91, 14.95) | 15.88 (15.87, 15.90) |
|                                               | 10      | 0.05 (0.04, 0.07)  | 0.90 (0.87, 0.92) | 2.6 (2.57, 2.62)  | 4.61 (4.58, 4.64) | 6.63 (6.60, 6.66) | 8.49 (8.46, 8.52)    | 10.14 (10.11, 10.16) | 11.56 (11.54, 11.59) | 12.79 (12.77, 12.81) | 13.83 (13.81, 13.85) |
|                                               | 20      | 0.01 (-0.01, 0.03) | 0.37 (0.35, 0.40) | 1.58 (1.55, 1.61) | 3.30 (3.27, 3.33) | 5.16 (5.13, 5.19) | 6.95 (6.92, 6.98)    | 8.58 (8.55, 8.60)    | 10.02 (10.00, 10.05) | 11.28 (11.26, 11.30) | 12.37 (12.35, 12.39) |
| Coordinated regional                          | 1       | 0.89 (0.88, 0.91)  | 2.91 (2.89, 2.93) | 5.2 (5.18, 5.23)  | 7.46 (7.43, 7.49) | 9.53 (9.50, 9.56) | 11.34 (11.31, 11.36) | 12.88 (12.86, 12.90) | 14.19 (14.17, 14.22) | 15.30 (15.28, 15.32) | 16.24 (16.23, 16.26) |
|                                               | 10      | 0.01 (-0.01, 0.02) | 0.86 (0.83, 0.88) | 3.14 (3.12, 3.17) | 5.63 (5.61, 5.66) | 7.92 (7.90, 7.95) | 9.90 (9.88, 9.93)    | 11.58 (11.56, 11.60) | 12.99 (12.97, 13.02) | 14.18 (14.16, 14.20) | 15.18 (15.16, 15.20) |
|                                               | 20      | 0.01 (0.00, 0.03)  | 0.07 (0.04, 0.09) | 1.21 (1.18, 1.24) | 3.53 (3.50, 3.56) | 5.97 (5.94, 5.99) | 8.12 (8.10, 8.15)    | 9.96 (9.94, 9.98)    | 11.50 (12.77, 12.82) | 12.79 (12.77, 12.82) | 13.88 (13.86, 13.90) |

| Nursing Homes        |    |                   |                   |                   |                   |                   |                    |                   |                   |                   |                   |
|----------------------|----|-------------------|-------------------|-------------------|-------------------|-------------------|--------------------|-------------------|-------------------|-------------------|-------------------|
| Uncoordinated        | 1  | 0.02 (0.02, 0.02) | 0.10 (0.09, 0.10) | 0.27 (0.27, 0.28) | 0.57 (0.56, 0.57) | 0.98 (0.97, 0.98) | 1.47 (1.46, 1.47)  | 2.03 (2.02, 2.04) | 2.63 (2.62, 2.64) | 3.23 (3.22, 3.24) | 3.80 (3.79, 3.81) |
|                      | 10 | 0.01 (0.01, 0.01) | 0.03 (0.03, 0.03) | 0.11 (0.11, 0.12) | 0.29 (0.28, 0.29) | 0.55 (0.55, 0.56) | 0.91 (0.90, 0.92)  | 1.33 (1.32, 1.34) | 1.78 (1.78, 1.79) | 2.25 (2.24, 2.26) | 2.69 (2.68, 2.70) |
|                      | 20 | 0.01 (0.01, 0.01) | 0.02 (0.02, 0.02) | 0.06 (0.06, 0.06) | 0.17 (0.17, 0.18) | 0.37 (0.36, 0.38) | 0.65 (0.64, 0.65)  | 0.98 (0.97, 0.99) | 1.36 (1.35, 1.37) | 1.74 (1.73, 1.75) | 2.12 (2.10, 2.13) |
| Coordinated regional | 1  | 0.03 (0.03, 0.03) | 0.13 (0.12, 0.13) | 0.33 (0.33, 0.33) | 0.65 (0.65, 0.66) | 1.09 (0.08, 1.09) | 1.62 (1.61, 1.62)s | 2.21 (2.20, 2.21) | 2.84 (2.83, 2.85) | 3.48 (3.47, 3.48) | 4.08 (4.07, 4.09) |
|                      | 10 | 0.01 (0.01, 0.01) | 0.04 (0.03, 0.04) | 0.16 (0.15, 0.16) | 0.40 (0.40, 0.41) | 0.76 (0.75, 0.77) | 1.21 (1.21, 1.22)  | 1.73 (1.72, 1.74) | 2.29 (2.28, 2.30) | 2.84 (2.83, 2.85) | 3.38 (3.37, 3.39) |
|                      | 20 | 0.01 (0.01, 0.01) | 0.02 (0.01, 0.02) | 0.06 (0.06, 0.06) | 0.21 (0.21, 0.21) | 0.48 (0.48, 0.49) | 0.85 (0.84, 0.86)  | 1.29 (1.28, 1.30) | 1.77 (1.76, 1.78) | 2.25 (2.24, 2.26) | 2.72 (2.71, 2.73) |
